# Supplementary material for: Investigation of Cytotoxicity, Oxidative Stress, and Inflammatory Responses of Tantalum Nanoparticles in THP-1-Derived Macrophages
Source: Hindawi journal article supplement (doi:10.1155/2020/3824593), 2020-12-03
Supplement: f1 [file 3824593.f1.zip]

Supplementary Table 1.

| Sample               | Average SEM<br>Size (nm) | Hydrodynamic radius (nm) |     |      |              |
|----------------------|--------------------------|--------------------------|-----|------|--------------|
|                      |                          | ddH <sub>2</sub> O       | PBS | RPMI | RPMI+10% FBS |
| Ta NPs               | 67.9±22.1 nm             | 67                       | 186 | 111  | 112          |
| TiO <sub>2</sub> NPs | 54.3±14.6 nm             | 155                      | 283 | 139  | 196          |
