# Supplementary material for: Investigation of Cytotoxicity, Oxidative Stress, and Inflammatory Responses of Tantalum Nanoparticles in THP-1-Derived Macrophages
Source: Mediators Inflamm. 2020 Dec 3;2020:3824593. doi: 10.1155/2020/3824593 (PMC7732397; doi:10.1155/2020/3824593)
Supplement: Supplementary Materials — Supplementary Table 1: hydrodynamic radius measured by DLS. TiO2 and Ta nanoparticles (NPs) were dispersed in ddH2O, PBS, RPMI 1640, and RPMI 1640 containing 10% FBS at 250 μg/mL. Hydrodynamic radius (nm) was determined by DLS, and data from major peaks were presented. Supplementary Figure 1: endotoxin contamination of TiO2 and Ta NPs. Quantitative evaluation of endotoxin contamination was determined by an LAL endotoxin assay kit. Data were representative of three independent experiments. The endotoxin level was calculated according to the standard curve. n.d.: not detectable. Supplementary Figure 2: spectral intensities of the Ta (a) and TiO2 (b) samples observed in the energy-dispersive X-ray (EDX) analysis system. The spectra were analyzed in high vacuum (accelerating voltage: 20kV; spot size: 5.5). No contamination of other elements were observed. Supplementary Figure 3: cytotoxic effects of TiO2 and Ta NPs on macrophages from 1 day to 7 days. (a, b) Cell viability was determined by CCK-8 assay at indicated time points. (c, d) Lactate dehydrogenase (LDH) leakage was evaluated by LDH assay after 24h. Viability and LDH release are normalized and expressed as mean + SD as percentage of untreated cells of three independent experiments (∗p < 0.05, ∗∗p < 0.01, and ∗∗∗p < 0.001). n.d.: not detectable. Nc: nontreated control. Supplementary Figure 4: cytotoxic effects of inhibitors on macrophages. Macrophages were incubated with different concentrations of uptake inhibitors, and cell viability was evaluated by CCK-8 assay. Viability is normalized and expressed as mean + SD as the percentage of untreated cells of three independent experiments. ∗p < 0.05, compared with control. [file 3824593.f1.zip › 3824593.f1/Zhang et al supplementary materials 102920fas final print.docx]

## Supplementary Materials

| Sample | Average SEM Size (nm) | Hydrodynamic radius (nm) | | | |
| --- | --- | --- | --- | --- | --- |
| ddH2O | PBS | RPMI | RPMI+10% FBS |
| Ta NPs | 67.9±22.1 nm | 67 | 186 | 111 | 112 |
| TiO2 NPs | 54.3±14.6 nm | 155 | 283 | 139 | 196 |

**Supplementary Table 1. Hydrodynamic radius measured by DLS.** TiO2 and Ta nanoparticles (NPs) were dispersed in ddH2O, PBS, RPMI 1640, and RPMI 1640 containing 10% FBS at 250 μg/mL. Hydrodynamic radius (nm) were determined by DLS and data from major peaks were presented.


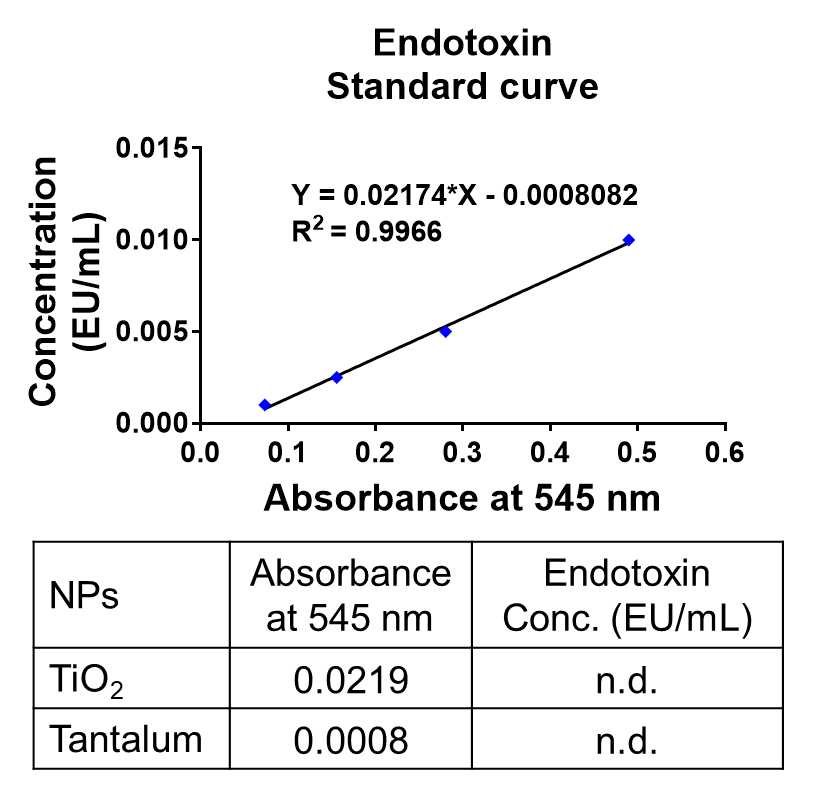


**Supplementary Figure 1. Endotoxin contamination of TiO2 and Ta NPs.** Quantitative evaluation of endotoxin contamination was determined by LAL endotoxin assay kit. Data were representative of three independent experiments. The endotoxin level was calculated according to the standard curve. n.d.: not detectable.

**
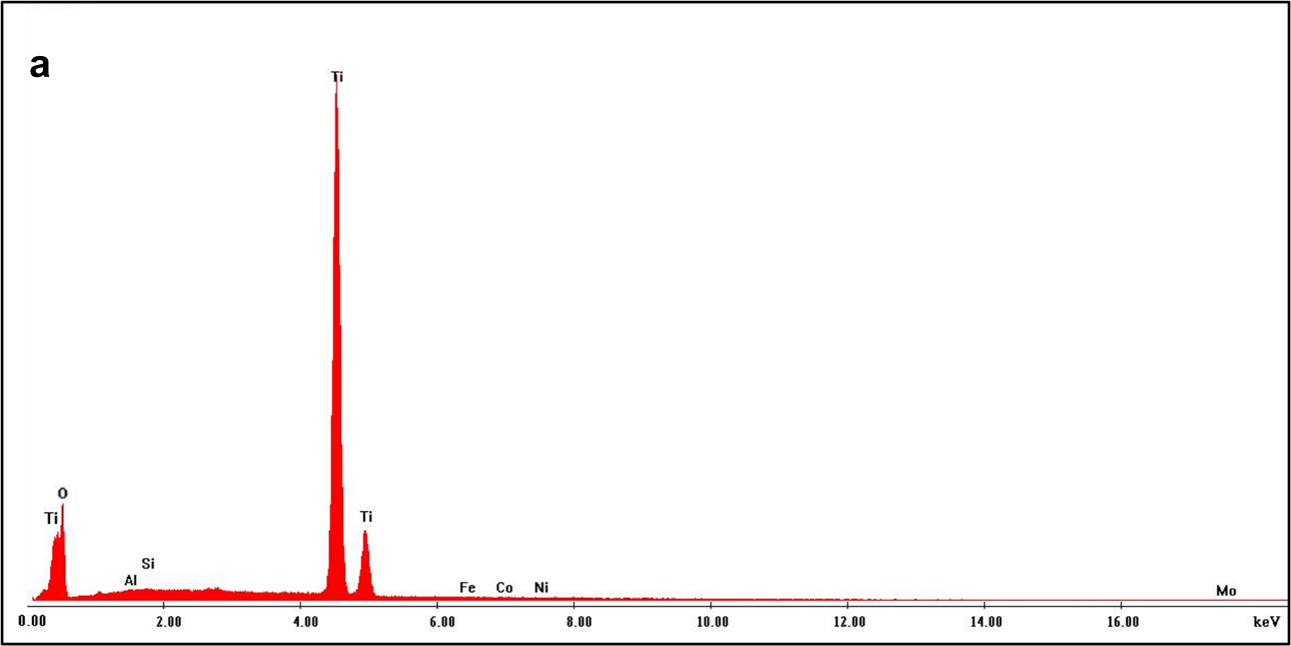
**

**
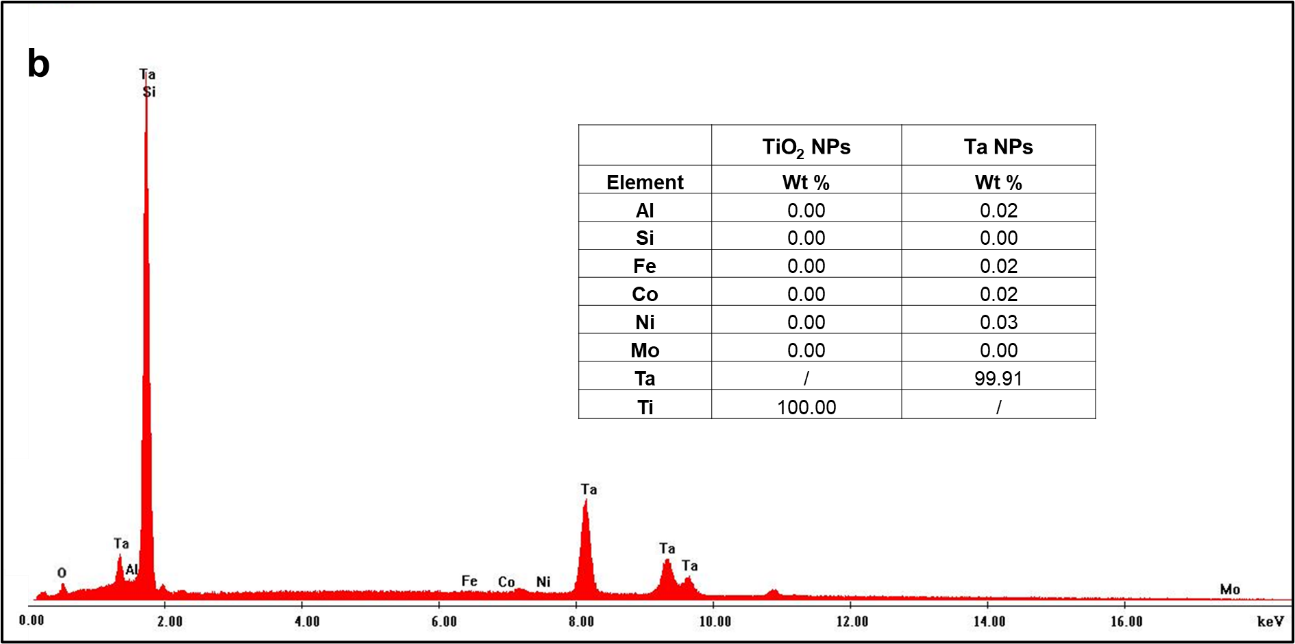
**

**Supplementary Figure 2. Spectral intensities of the TiO2 (a) and Ta (b) samples observed in energy dispersive X-ray analysis system (EDX).** The spectra were analyzed in high vacuum (accelerating voltage: 20 kV, spot size: 5.5). No contamination of other elements were observed.

**
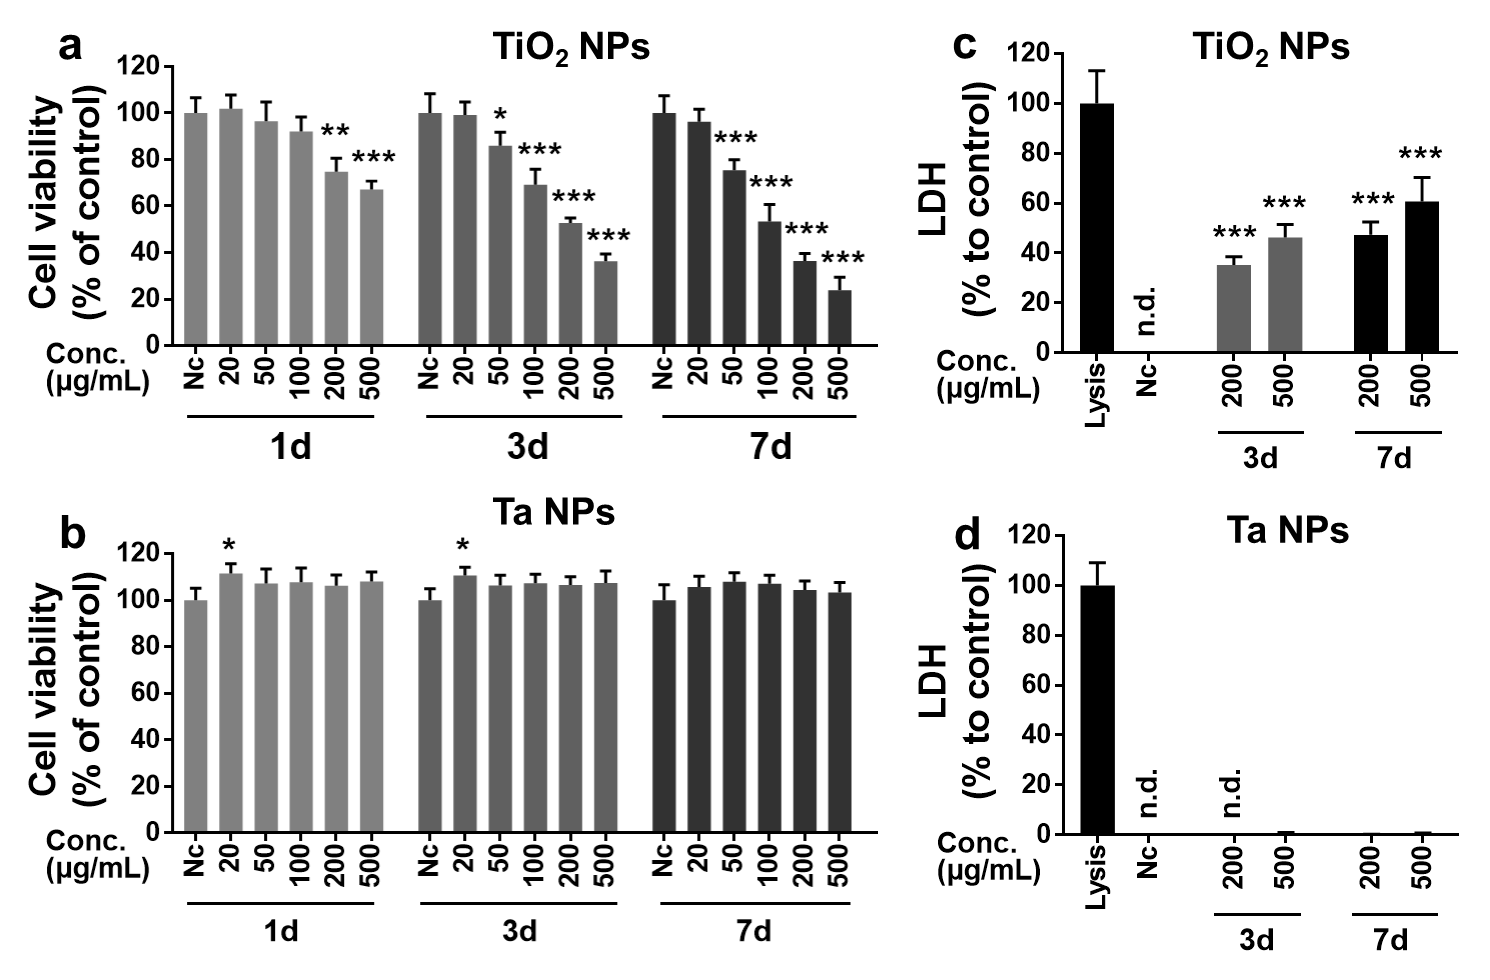
**

**Supplementary Figure 3. Cytotoxic effects of TiO2 and Ta NPs on macrophages from 1 day to 7 days.** (a, b) Cell viability was determined by CCK-8 assay at indicated time points. (c, d) Lactate dehydrogenase (LDH) leakage was evaluated by LDH assay after 24 h. Viability and LDH release are normalized and expressed as mean + SD as percentage of untreated cells of three independent experiments (* p < 0.05, ** p < 0.01, *** p < 0.001). n.d.: not detectable. Nc: non-treated control


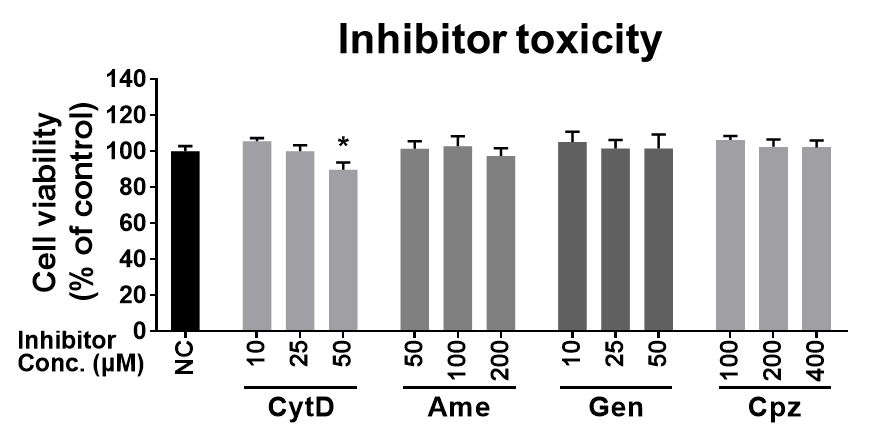


**Supplementary Figure 4. Cytotoxic effects of inhibitors on macrophages.** Macrophages were incubated with different concentrations of uptake inhibitors, and cell viability was evaluated by CCK-8 assay. Viability is normalized and expressed as mean + SD as the percentage of untreated cells of three independent experiments. * p < 0.05, compared with control.
