# Supplementary figures and images for: Investigation of Cytotoxicity, Oxidative Stress, and Inflammatory Responses of Tantalum Nanoparticles in THP-1-Derived Macrophages
Source: Hindawi journal article supplement (doi:10.1155/2020/3824593), 2020-12-03

Supplementary Figure 3.

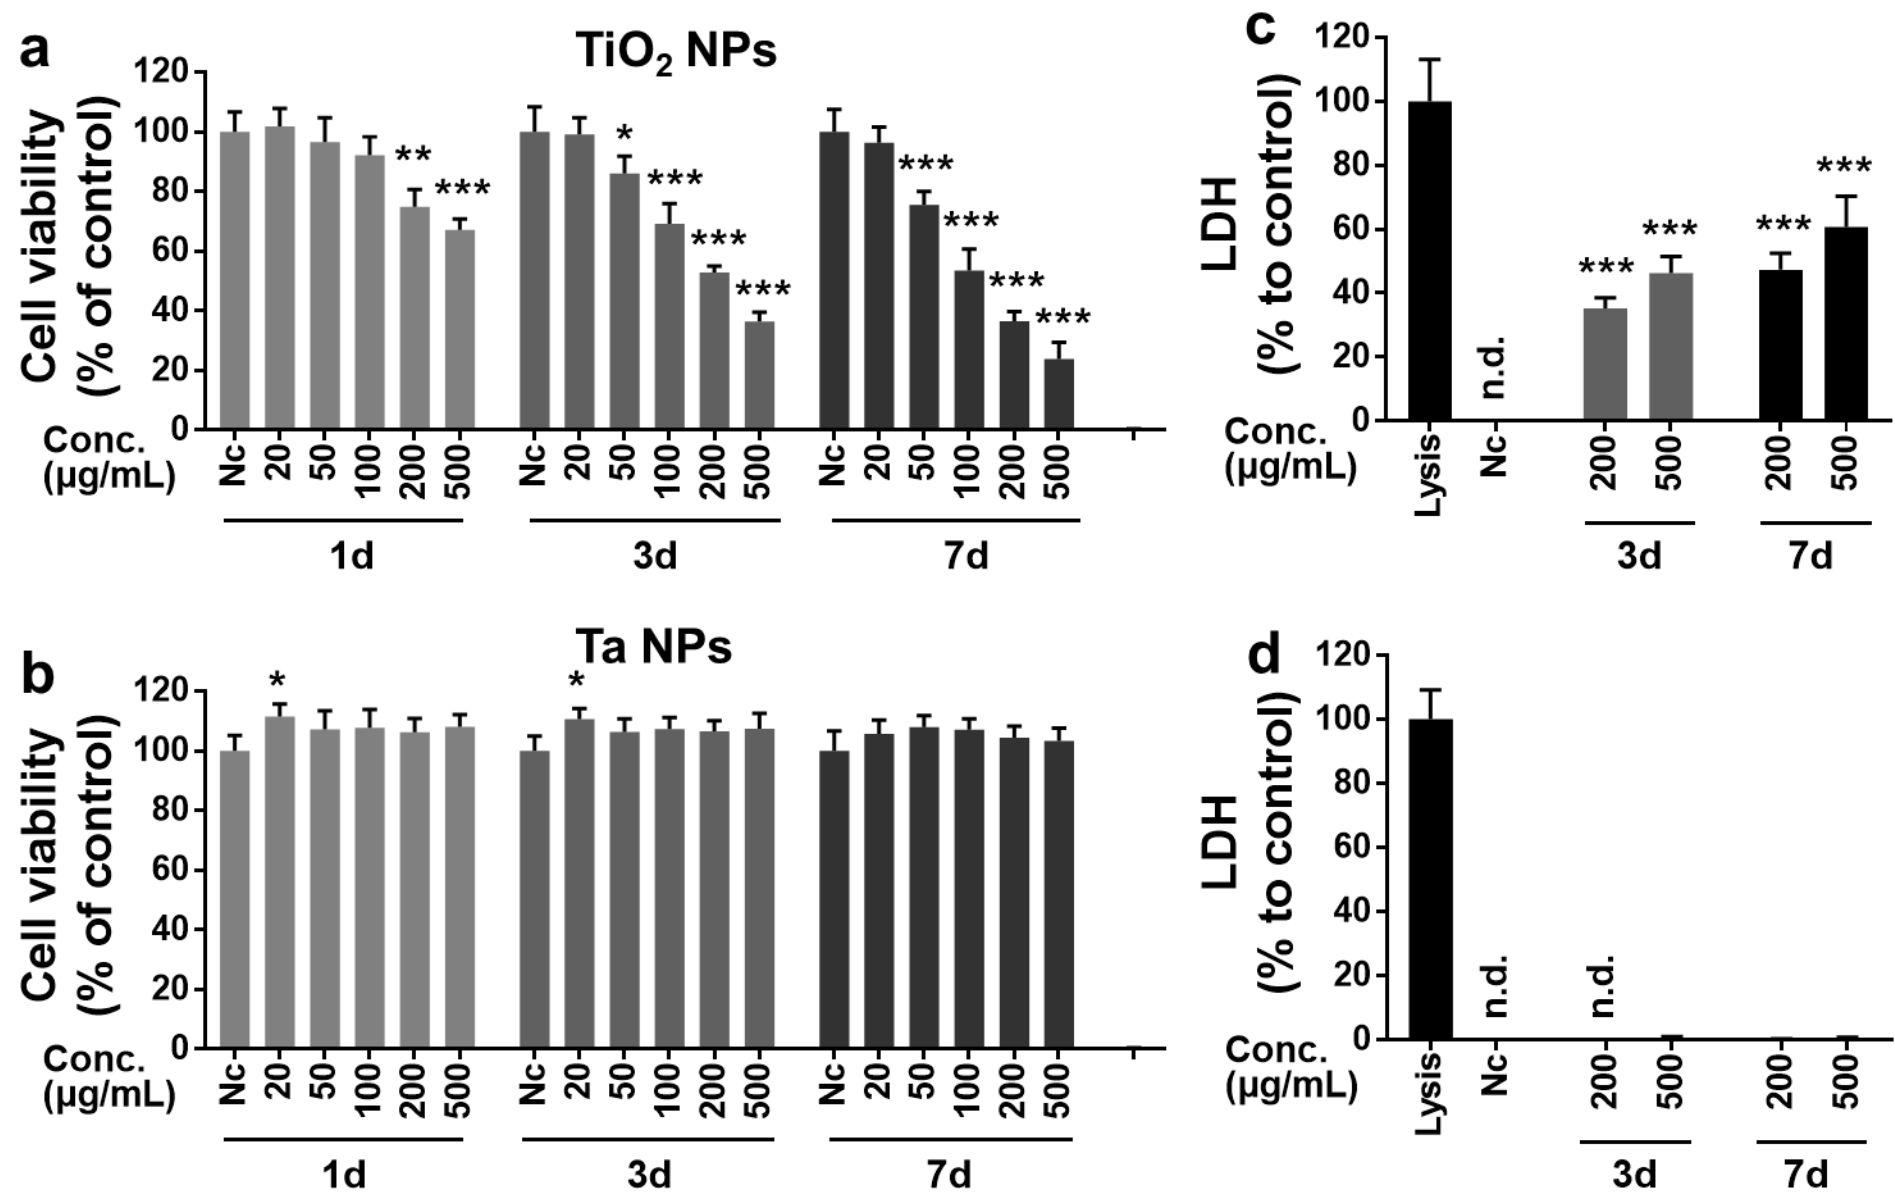

Supplement: f1 [file 3824593.f1.zip]

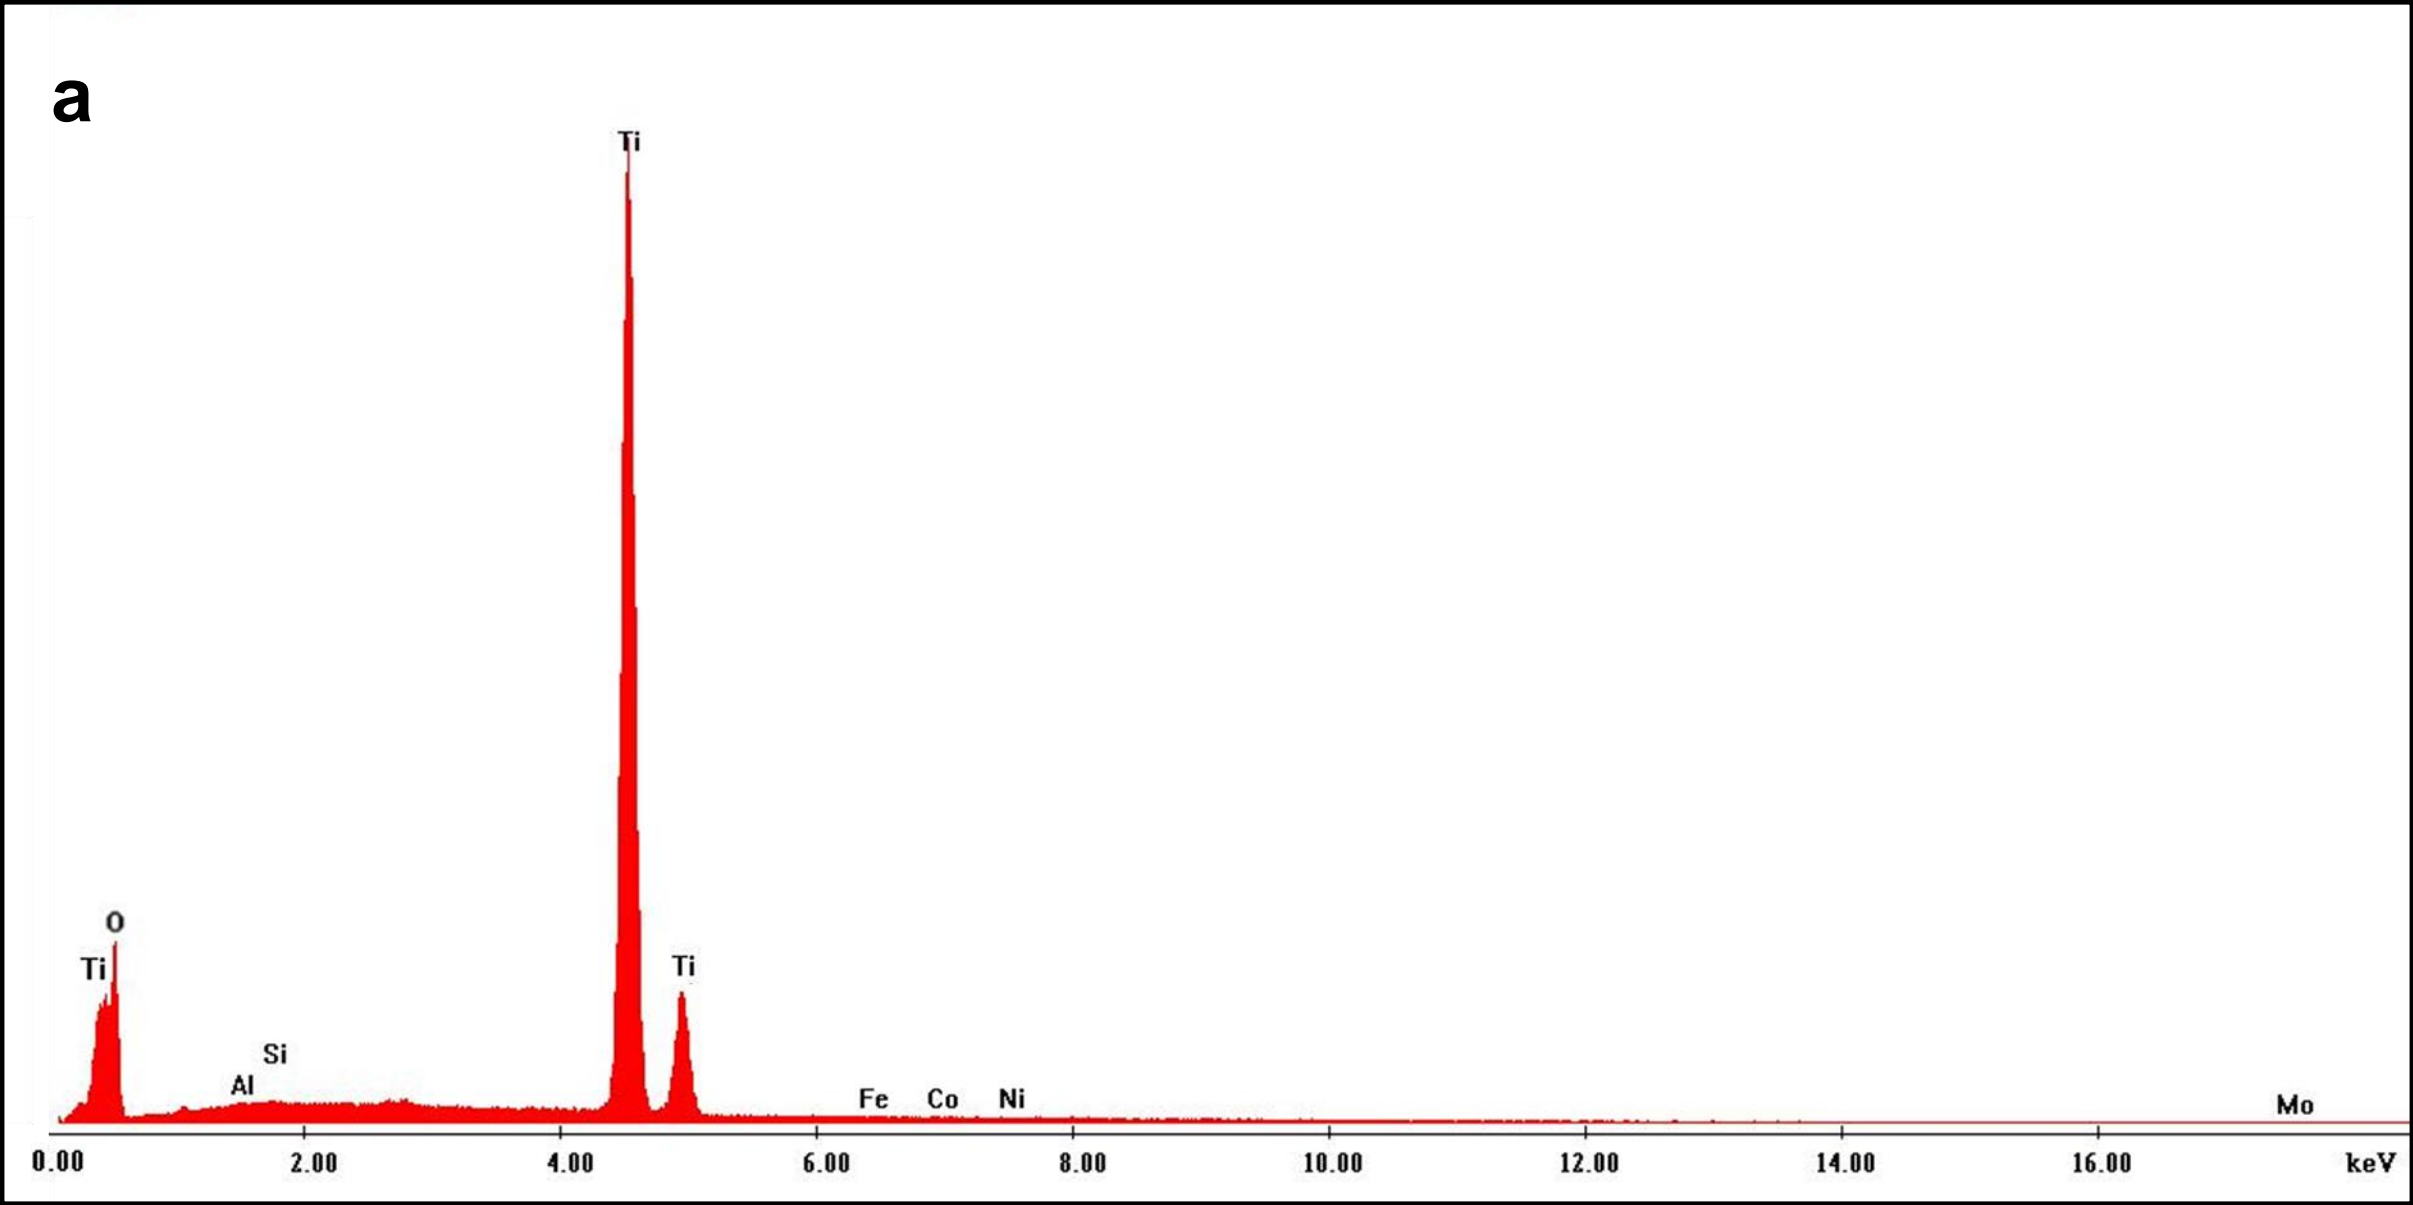

**b**

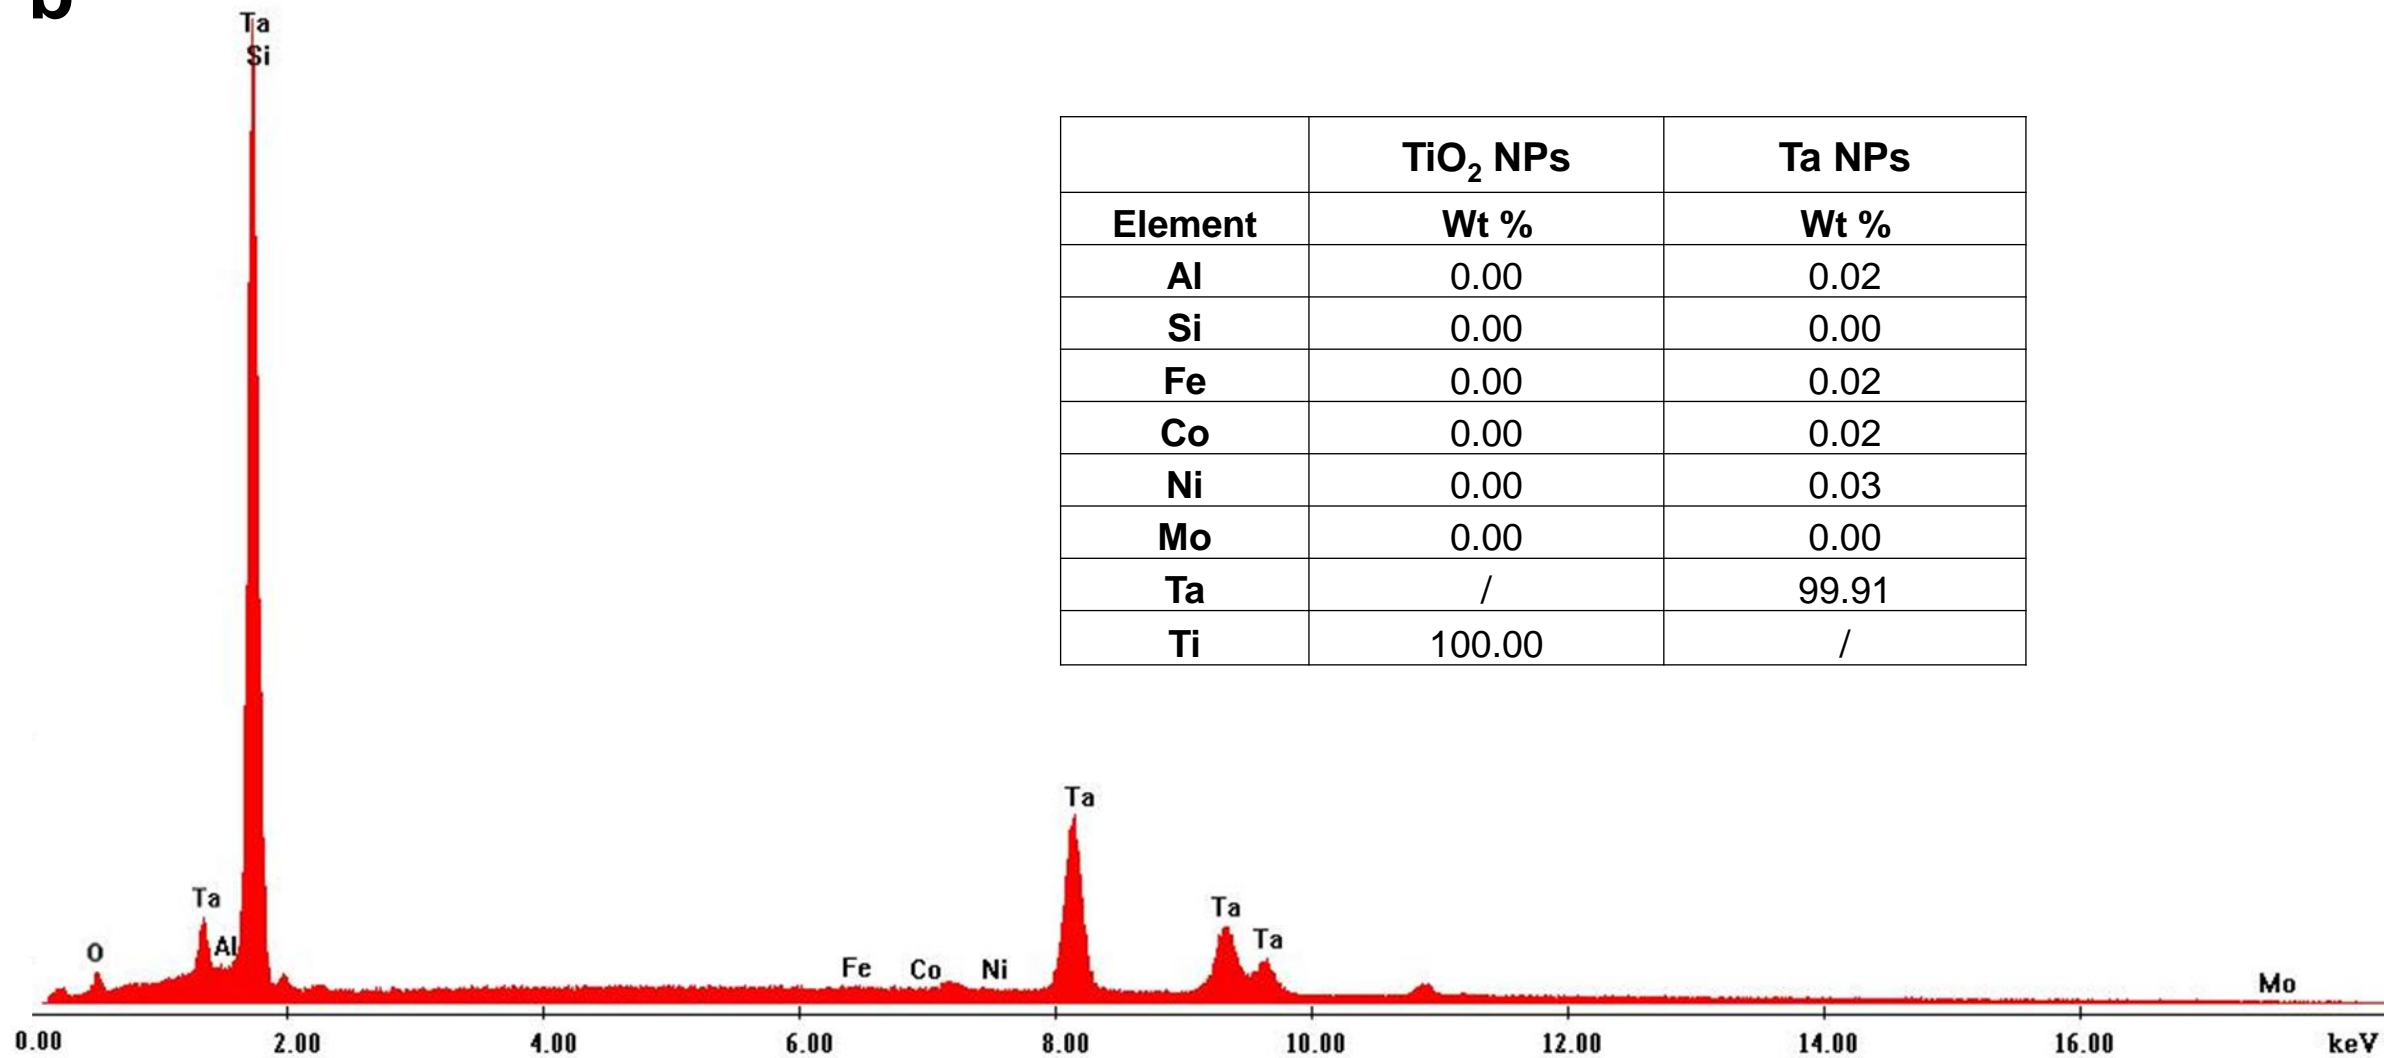

Supplement: f1 [file 3824593.f1.zip]

Supplementary Figure 4

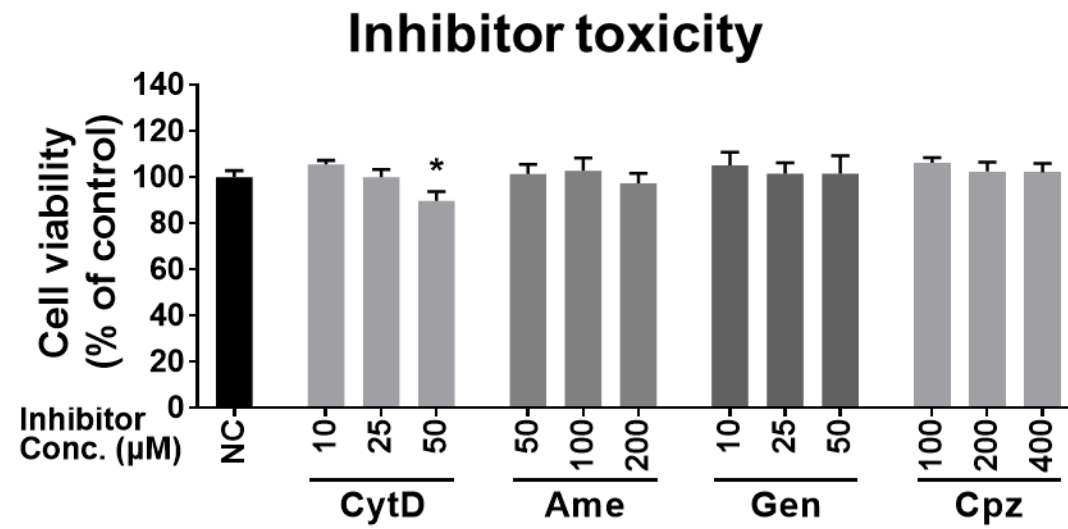

Supplement: f1 [file 3824593.f1.zip]

Supplementary Figure 1.

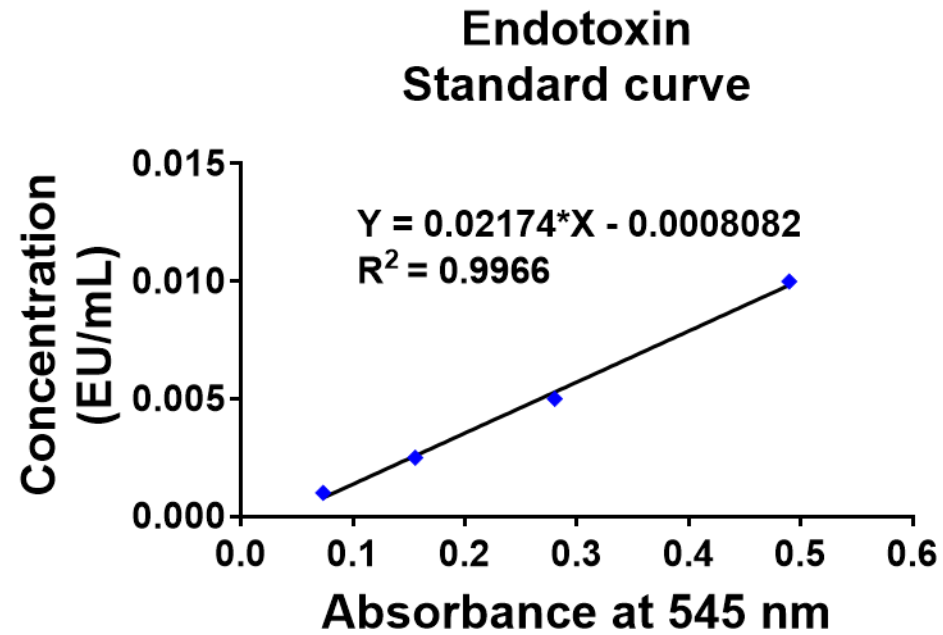

| NPs              | Absorbance at 545 nm | Endotoxin Conc. (EU/mL) |
|------------------|----------------------|-------------------------|
| TiO <sub>2</sub> | 0.0219               | n.d.                    |
| Tantalum         | 0.0008               | n.d.                    |

Supplement: f1 [file 3824593.f1.zip]
